# Supplementary material for: Preparation for a potential outbreak of bluetongue virus in Ireland: surveillance design to estimate local prevalence after an initial case detection
Source: Research Square preprint supplement (doi:10.21203/rs.3.rs-7106740/v1), 2025-07-22
Supplement: Supplementary file 1 [file b6128e081a7149fb624e1924.docx]

Preparation for a potential outbreak of bluetongue virus in Ireland: surveillance design to estimate local prevalence after an initial case detection

Miriam Casey Bryars1,2, Jamie A. Tratalos1, Jamie M. Madden1, Guy McGrath1

1. Centre for Veterinary Epidemiology and Risk Analysis, School of Veterinary Medicine, University College Dublin, Belfield, Dublin 4, Ireland.
2. School of Veterinary Medicine, University College Dublin, Belfield, Dublin 4, Ireland.

Correspondence to: Miriam Casey; [miriam.casey@ucd.ie](mailto:miriam.casey@ucd.ie), School of Veterinary Medicine, University College Dublin, Belfield, Dublin D04 W6F6, Ireland.

# Supplementary materials

## Data from English outbreak of BTV-8 in 2007 and 2008

We used BTV-8 surveillance data from England in 2007 and 2008 (1), comprising targeted surveillance around confirmed cases. Surveillance was reported in Ipswich, Lowestoft and Peterborough in East Anglia in September 2007. Ipswich and Lowestoft were close to the initial incursion site, whereas Peterborough was further west. There were also data from Poole based on follow up surveillance after an initial confirmation from a pre-movement test in February 2008. Ipswich and Lowestoft had between-herd prevalences of 61% and 66%, respectively, whereas targeted testing in Peterborough did not detect any further cases. In Poole, a five percent between herd prevalence was detected. The same English BTV-8 dataset reported within herd prevalence, in 39 herds, of between 1% and 51% with a median of 6% and a mean of 11%.

## Data from the Dutch outbreak of BTV-3 in 2023 and 2024

In a longitudinal study of 5 cattle herds with BTV-3 in the Netherlands in October 2023 to February 2024 (2), PCR positivity rates ranged from 5 - 51% (mean = 32.2%) in the first week of the study, and seropositivity ranged from 5 – 41% (mean = 16%). In the thirteenth week of the study seropositivity ranged from 4% - 55% (mean = 26%). Within-herd prevalence and morbidity (the proportion of animals with reported clinical signs) was higher in cattle than in sheep herds. However, case fatality and overall change in mortality compared to the previous year was markedly higher in the sheep herds. Reports from the Netherlands suggest that there are more severe clinical signs associated with BTV-3 than with BTV-8.

A between-herd prevalence study was conducted on unvaccinated Dutch dairy herds using bulk milk ELISA testing for antibodies against BTV in Autumn 2023. Overall between-herd prevalence was 64% (95% CI: 63 – 65%), ranging from a minimum of five percent in the least affected region to 99% in the most heavily infected. Although this methodology is not yet described or peer-reviewed, based on semiquantitative estimates from the milk ELISA, Dutch experts estimated that within-herd prevalence was 36% (95% CI: 35 – 37%), ranging from 13% in the least affected area to 56% in the most affected (3) . Without considering herd-level clustering, the same study estimated animal level prevalence of 23% (95% CI: 22 – 24%), ranging from 1% to 51% depending on the region.

**Supplementary table 1: Within herd morbidity, mortality, PCR and seropositivity data extracted from a study of a sample of herds with at least 100 animals in the Netherlands which had BTV-3 infections confirmed in October 2023 and which were monitored over a 13 week period until February2024** (2)**. The percentages in brackets represent the minimum and maximum for each study group). * Where figures were not reported in the text of the paper they were estimated from plots.**

| **Species** | **N farms** | **Morbidity** | **Mortality** | **PCR positive rate week 1*** | **Seropositivity week 1*** | **Seropositivity week 13** |
| --- | --- | --- | --- | --- | --- | --- |
| Cattle | 5 | 24.5% (8.1 – 50.4%) | Low. 1 cow reported dead in 4 of 5 farms versus 0 previous year. | 23.2 (5 – 51) | 16% (5 – 41%) | 26% (4% - 55%) |
| Sheep | 5 | 7.5% (0.9 – 14.2%) | High. Case fatality rate was 74.8%. On average 45 sheep per herd dies in study period compared to 13 previous year. | 13% ( 2 – 30%) | 12% (2 – 22%) | 7% (2 – 22%) |
| Goats | 3 | 1.1% (0.3 – 3.6%) | Case fatality 44%. Mortality not different to previous year. |  |  | (0 – 12%) |

# References for supplementary material

1. DEFRA. Food and Farming Group Veterinary Sciences Core team. 2008 [cited 2024 Sep 5]. p. 1–31 Report on the distribution of bluetongue infection in Great Britain on 15 March 2008. Available. Available from: https://webarchive.nationalarchives.gov.uk/ukgwa/20090731155903/http:/www.defra.gov.uk/animalh/diseases/notifiable/bluetongue/pdf/epi-report080508.pdf

2. Van den Brink KMJA, Santman-Berends IMGA, Harkema L, Scherpenzeel CGM, Dijkstra E, Bisschop PIH, et al. Bluetongue virus serotype 3 in the Netherlands; clinical signs, seroprevalences and pathological findings in ruminants. Veterinary Record. 2024;Accepted(July):1–10.

3. Santman-Berends I, van den Brink K, Mars J, Veldhuis A, Bogt-Kappert C ter. Royal GD Netherlands. 2024 [cited 2024 Sep 6]. Prevalence of bluetongue virus serotype 3 in Dutch cattle population. Available from: https://www.gddiergezondheid.nl/Diergezondheid/Onderzoek/Onderzoek-antistoffen-blauwtongvirus
